# Supplementary material for: Diverse Co(II) Coordination Polymers with the Same Mixed Ligands: Evaluation for Chemical Stability and Structural Transformation
Source: Preprints.org preprint supplement (doi:10.20944/preprints202403.0256.v1), 2024-03-05

---

The following ALERTS were generated. Each ALERT has the format

**test-name\_ALERT\_alert-type\_alert-level.**

Click on the hyperlinks for more details of the test.

---

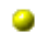

### Alert level C

|                   |                                              |                  |       |        |
|-------------------|----------------------------------------------|------------------|-------|--------|
| PLAT250_ALERT_2_C | Large U3/U1 Ratio for <U(i,j)> Tensor(Resd   | 1)               | 2.1   | Note   |
| PLAT369_ALERT_2_C | Long C(sp2)-C(sp2) Bond C7 - C8              | .                | 1.54  | Ang.   |
| PLAT911_ALERT_3_C | Missing FCF Refl Between Thmin & STh/L=      | 0.600            | 6     | Report |
|                   | 6 -9 10, 4-11 12, 5-11 12, 3-11 13, 2-10 13, | 1 -9 14,         |       |        |
| PLAT971_ALERT_2_C | Check Calcd Resid. Dens.                     | 1.17Ang From O10 | 1.62  | eA-3   |
| PLAT975_ALERT_2_C | Check Calcd Resid. Dens.                     | 0.71Ang From O10 | 0.73  | eA-3   |
| PLAT976_ALERT_2_C | Check Calcd Resid. Dens.                     | 0.88Ang From O10 | -1.04 | eA-3   |
| PLAT976_ALERT_2_C | Check Calcd Resid. Dens.                     | 0.96Ang From O10 | -0.57 | eA-3   |
| PLAT977_ALERT_2_C | Check Negative Difference Density on H10A    | .                | -0.48 | eA-3   |
| PLAT977_ALERT_2_C | Check Negative Difference Density on H10B    | .                | -0.79 | eA-3   |
| PLAT977_ALERT_2_C | Check Negative Difference Density on H12E    | .                | -0.72 | eA-3   |
| PLAT977_ALERT_2_C | Check Negative Difference Density on H29A    | .                | -0.34 | eA-3   |
| PLAT977_ALERT_2_C | Check Negative Difference Density on H29B    | .                | -0.44 | eA-3   |
| PLAT977_ALERT_2_C | Check Negative Difference Density on H29D    | .                | -0.36 | eA-3   |
| PLAT977_ALERT_2_C | Check Negative Difference Density on H29E    | .                | -0.31 | eA-3   |
| PLAT977_ALERT_2_C | Check Negative Difference Density on H29F    | .                | -0.52 | eA-3   |

---

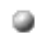

### Alert level G

|                   |                                                    |                |           |
|-------------------|----------------------------------------------------|----------------|-----------|
| PLAT004_ALERT_5_G | Polymeric Structure Found with Maximum Dimension   | 2              | Info      |
| PLAT007_ALERT_5_G | Number of Unrefined Donor-H Atoms .....            | 11             | Report    |
|                   | H2A H3A H9C H9D H10A H10B H12E H11B H11C H11E H11F |                |           |
| PLAT154_ALERT_1_G | The s.u.'s on the Cell Angles are Equal ..(Note)   | 0.003          | Degree    |
| PLAT300_ALERT_4_G | Atom Site Occupancy of O12                         | Constrained at | 0.5 Check |
| PLAT300_ALERT_4_G | Atom Site Occupancy of O12'                        | Constrained at | 0.5 Check |
| PLAT300_ALERT_4_G | Atom Site Occupancy of C29                         | Constrained at | 0.5 Check |
| PLAT300_ALERT_4_G | Atom Site Occupancy of C29'                        | Constrained at | 0.5 Check |
| PLAT300_ALERT_4_G | Atom Site Occupancy of H29A                        | Constrained at | 0.5 Check |
| PLAT300_ALERT_4_G | Atom Site Occupancy of H29B                        | Constrained at | 0.5 Check |
| PLAT300_ALERT_4_G | Atom Site Occupancy of H29C                        | Constrained at | 0.5 Check |
| PLAT300_ALERT_4_G | Atom Site Occupancy of H29D                        | Constrained at | 0.5 Check |
| PLAT300_ALERT_4_G | Atom Site Occupancy of H29E                        | Constrained at | 0.5 Check |
| PLAT300_ALERT_4_G | Atom Site Occupancy of H29F                        | Constrained at | 0.5 Check |
| PLAT302_ALERT_4_G | Anion/Solvent/Minor-Residue Disorder (Resd         | 2)             | 100% Note |
| PLAT302_ALERT_4_G | Anion/Solvent/Minor-Residue Disorder (Resd         | 3)             | 100% Note |
| PLAT302_ALERT_4_G | Anion/Solvent/Minor-Residue Disorder (Resd         | 4)             | 100% Note |
| PLAT309_ALERT_2_G | Single Bonded Oxygen (C-O > 1.3 Ang) .....         | O12'           | Check     |
| PLAT413_ALERT_2_G | Short Inter XH3 .. XHn H6C ..H29F                  | .              | 2.06 Ang. |
|                   | 2-x,2-y,2-z =                                      | 2_777          | Check     |
| PLAT413_ALERT_2_G | Short Inter XH3 .. XHn H18A ..H29E                 | .              | 1.75 Ang. |
|                   | 3-x,2-y,2-z =                                      | 2_877          | Check     |
| PLAT414_ALERT_2_G | Short Intra D-H..H-X H12E ..H29A                   | .              | 2.11 Ang. |
|                   | x,y,z =                                            | 1_555          | Check     |
| PLAT414_ALERT_2_G | Short Intra D-H..H-X H12E ..H29D                   | .              | 1.69 Ang. |
|                   | x,y,z =                                            | 1_555          | Check     |
| PLAT414_ALERT_2_G | Short Intra D-H..H-X H12E ..H29E                   | .              | 1.91 Ang. |
|                   | x,y,z =                                            | 1_555          | Check     |
| PLAT414_ALERT_2_G | Short Intra D-H..H-X H12E ..H29F                   | .              | 0.40 Ang. |
|                   | x,y,z =                                            | 1_555          | Check     |
| PLAT417_ALERT_2_G | Short Inter D-H..H-D H3A ..H11F                    | .              | 1.35 Ang. |

|                                                                    |                                                            |             |
|--------------------------------------------------------------------|------------------------------------------------------------|-------------|
|                                                                    | x,y,1+z =                                                  | 1_556 Check |
| PLAT417_ALERT_2_G Short Inter D-H..H-D                             | H10B ..H11B .                                              | 1.97 Ang.   |
|                                                                    | 2-x,2-y,1-z =                                              | 2_776 Check |
| PLAT804_ALERT_5_G Number of ARU-Code Packing Problem(s) in PLATON  |                                                            | 8 Info      |
| PLAT883_ALERT_1_G No Info/Value for _atom_sites_solution_primary . |                                                            | Please Do ! |
| PLAT912_ALERT_4_G Missing # of FCF Reflections Above STh/L= 0.600  |                                                            | 135 Note    |
| PLAT941_ALERT_3_G Average HKL Measurement Multiplicity .....       |                                                            | 3.6 Low     |
| PLAT969_ALERT_5_G The 'Henn et al.' R-Factor-gap value .....       |                                                            | 4.05 Note   |
|                                                                    | Predicted wR2: Based on SigI**2 2.69 or SHELX Weight 10.70 |             |
| PLAT978_ALERT_2_G Number C-C Bonds with Positive Residual Density. |                                                            | 9 Info      |
| PLAT992_ALERT_5_G Repd & Actual _reflns_number_gt Values Differ by |                                                            | 2 Check     |

---

0 **ALERT level A** = Most likely a serious problem - resolve or explain  
 0 **ALERT level B** = A potentially serious problem, consider carefully  
 15 **ALERT level C** = Check. Ensure it is not caused by an omission or oversight  
 32 **ALERT level G** = General information/check it is not something unexpected

2 ALERT type 1 CIF construction/syntax error, inconsistent or missing data  
 24 ALERT type 2 Indicator that the structure model may be wrong or deficient  
 2 ALERT type 3 Indicator that the structure quality may be low  
 14 ALERT type 4 Improvement, methodology, query or suggestion  
 5 ALERT type 5 Informative message, check

---

## Datablock: 2

---

Bond precision: C-C = 0.0024 A                      Wavelength=0.71073

Cell:                      a=10.537(3)                      b=12.378(2)                      c=12.849(2)  
                               alpha=61.476(8)                      beta=72.697(10)                      gamma=85.374(14)

Temperature:              293 K

|                        | Calculated                                 | Reported            |
|------------------------|--------------------------------------------|---------------------|
| Volume                 | 1402.0(5)                                  | 1402.0(5)           |
| Space group            | P -1                                       | P -1                |
| Hall group             | -P 1                                       | -P 1                |
| Moiety formula         | C21 H15 Co N2 O7 S, C7 H7<br>N2 O, 2(H2 O) | ?                   |
| Sum formula            | C28 H26 Co N4 O10 S                        | C28 H26 Co N4 O10 S |
| Mr                     | 669.52                                     | 669.52              |
| Dx, g cm <sup>-3</sup> | 1.586                                      | 1.586               |
| Z                      | 2                                          | 2                   |
| Mu (mm <sup>-1</sup> ) | 0.754                                      | 0.754               |
| F000                   | 690.0                                      | 690.0               |
| F000'                  | 691.27                                     |                     |
| h,k,lmax               | 14,16,17                                   | 14,16,17            |
| Nref                   | 6953                                       | 6938                |
| Tmin,Tmax              | 0.834,0.860                                | 0.685,0.746         |
| Tmin'                  | 0.740                                      |                     |

Correction method= # Reported T Limits: Tmin=0.685 Tmax=0.746  
AbsCorr = MULTI\_SCAN

Data completeness= 0.998

Theta(max)= 28.280

R(reflections)= 0.0296( 6419)

wR2(reflections)=  
0.0841( 6938)

S = 1.063

Npar= 397

The following ALERTS were generated. Each ALERT has the format

**test-name\_ALERT\_alert-type\_alert-level.**

Click on the hyperlinks for more details of the test.

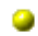

#### Alert level C

|                   |                                          |                        |         |              |
|-------------------|------------------------------------------|------------------------|---------|--------------|
| PLAT245_ALERT_2_C | U(iso) H9C                               | Smaller than U(eq) O9  | by      | 0.042 Ang**2 |
| PLAT245_ALERT_2_C | U(iso) H9D                               | Smaller than U(eq) O9  | by      | 0.042 Ang**2 |
| PLAT369_ALERT_2_C | Long                                     | C(sp2)-C(sp2) Bond C7  | - C7_e  | 1.54 Ang.    |
| PLAT369_ALERT_2_C | Long                                     | C(sp2)-C(sp2) Bond C28 | - C28_f | 1.54 Ang.    |
| PLAT911_ALERT_3_C | Missing FCF Refl Between Thmin & STh/L=  | 0.600                  |         | 2 Report     |
|                   | 5 -3 10, 5 10 14,                        |                        |         |              |
| PLAT976_ALERT_2_C | Check Calcd Resid. Dens.                 | 0.65Ang From O9        | .       | -0.94 eA-3   |
| PLAT976_ALERT_2_C | Check Calcd Resid. Dens.                 | 0.58Ang From O9        | .       | -0.88 eA-3   |
| PLAT976_ALERT_2_C | Check Calcd Resid. Dens.                 | 0.48Ang From O9        | .       | -0.87 eA-3   |
| PLAT976_ALERT_2_C | Check Calcd Resid. Dens.                 | 0.46Ang From O9        | .       | -0.85 eA-3   |
| PLAT977_ALERT_2_C | Check Negative Difference Density on H9C |                        | .       | -0.42 eA-3   |
| PLAT977_ALERT_2_C | Check Negative Difference Density on H9D |                        | .       | -0.52 eA-3   |

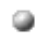

#### Alert level G

|                   |                                                           |      |             |
|-------------------|-----------------------------------------------------------|------|-------------|
| PLAT004_ALERT_5_G | Polymeric Structure Found with Maximum Dimension          | 2    | Info        |
| PLAT007_ALERT_5_G | Number of Unrefined Donor-H Atoms .....                   | 6    | Report      |
|                   | H2A H4A H9C H9D H10C H10D                                 |      |             |
| PLAT199_ALERT_1_G | Reported _cell_measurement_temperature ..... (K)          | 293  | Check       |
| PLAT200_ALERT_1_G | Reported _diffn_ambient_temperature ..... (K)             | 293  | Check       |
| PLAT794_ALERT_5_G | Tentative Bond Valency for Co (II) .                      | 1.98 | Info        |
| PLAT804_ALERT_5_G | Number of ARU-Code Packing Problem(s) in PLATON           | 1    | Info        |
| PLAT883_ALERT_1_G | No Info/Value for _atom_sites_solution_primary .          |      | Please Do ! |
| PLAT912_ALERT_4_G | Missing # of FCF Reflections Above STh/L= 0.600           | 13   | Note        |
| PLAT941_ALERT_3_G | Average HKL Measurement Multiplicity .....                | 3.7  | Low         |
| PLAT969_ALERT_5_G | The 'Henn et al.' R-Factor-gap value .....                | 4.45 | Note        |
|                   | Predicted wR2: Based on SigI**2 1.89 or SHELX Weight 8.14 |      |             |
| PLAT978_ALERT_2_G | Number C-C Bonds with Positive Residual Density.          | 20   | Info        |

---

0 **ALERT level A** = Most likely a serious problem - resolve or explain  
 0 **ALERT level B** = A potentially serious problem, consider carefully  
 11 **ALERT level C** = Check. Ensure it is not caused by an omission or oversight  
 11 **ALERT level G** = General information/check it is not something unexpected

3 ALERT type 1 CIF construction/syntax error, inconsistent or missing data  
 11 ALERT type 2 Indicator that the structure model may be wrong or deficient  
 2 ALERT type 3 Indicator that the structure quality may be low  
 1 ALERT type 4 Improvement, methodology, query or suggestion  
 5 ALERT type 5 Informative message, check

---

## Datablock: 3

---

Bond precision: C-C = 0.0055 A

Wavelength=0.71073

Cell: a=11.6913(8) b=12.5564(8) c=13.2862(8)  
 alpha=105.7159(18) beta=105.6037(18) gamma=91.3885(19)  
 Temperature: 296 K

|                | Calculated             | Reported            |
|----------------|------------------------|---------------------|
| Volume         | 1798.4(2)              | 1798.4(2)           |
| Space group    | P -1                   | P -1                |
| Hall group     | -P 1                   | -P 1                |
| Moiety formula | C35 H31 Co N6 O10 S, O | ?                   |
| Sum formula    | C35 H31 Co N6 O11 S    | C35 H33 Co N6 O11 S |
| Mr             | 802.65                 | 804.66              |
| Dx, g cm-3     | 1.482                  | 1.486               |
| Z              | 2                      | 2                   |
| Mu (mm-1)      | 0.605                  | 0.605               |
| F000           | 828.0                  | 832.0               |
| F000'          | 829.33                 |                     |
| h, k, lmax     | 14, 15, 16             | 14, 15, 16          |
| Nref           | 7084                   | 7082                |
| Tmin, Tmax     | 0.930, 0.941           |                     |
| Tmin'          | 0.886                  |                     |

Correction method= Not given

Data completeness= 1.000

Theta(max)= 26.000

R(reflections)= 0.0535( 4176)

wR2(reflections)=  
0.1061( 7082)

S = 1.004

Npar= 497

The following ALERTS were generated. Each ALERT has the format

**test-name\_ALERT\_alert-type\_alert-level.**

Click on the hyperlinks for more details of the test.



#### Alert level C

|                   |                                                  |                |              |
|-------------------|--------------------------------------------------|----------------|--------------|
| PLAT041_ALERT_1_C | Calc. and Reported SumFormula                    | Strings Differ | Please Check |
|                   | Calc: C35 H31 Co N6 O11 S                        |                |              |
|                   | Rep.: C35 H33 Co N6 O11 S                        |                |              |
| PLAT043_ALERT_1_C | Calculated and Reported Mol. Weight Differ by .. |                | 2.01 Check   |
| PLAT068_ALERT_1_C | Reported F000 Differs from Calcd (or Missing)... |                | Please Check |
| PLAT242_ALERT_2_C | Low 'MainMol' Ueq as Compared to Neighbors of    |                | C29 Check    |
| PLAT260_ALERT_2_C | Large Average Ueq of Residue Including O11'      |                | 0.103 Check  |
| PLAT369_ALERT_2_C | Long C(sp2)-C(sp2) Bond C7 - C8                  |                | 1.53 Ang.    |
| PLAT369_ALERT_2_C | Long C(sp2)-C(sp2) Bond C21 - C21_e              |                | 1.53 Ang.    |
| PLAT906_ALERT_3_C | Large K Value in the Analysis of Variance .....  |                | 2.942 Check  |

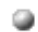

#### Alert level G

FORMU01\_ALERT\_2\_G There is a discrepancy between the atom counts in the  
     \_chemical\_formula\_sum and the formula from the \_atom\_site\* data.  
     Atom count from \_chemical\_formula\_sum: C35 H33 Co1 N6 O11 S1  
     Atom count from the \_atom\_site data: C35 H31 Co1 N6 O11 S1  
 CELLZ01\_ALERT\_1\_G Difference between formula and atom\_site contents detected.

CELLZ01\_ALERT\_1\_G WARNING: H atoms missing from atom site list. Is this intentional?  
 From the CIF: \_cell\_formula\_units\_Z 2  
 From the CIF: \_chemical\_formula\_sum C35 H33 Co N6 O11 S  
 TEST: Compare cell contents of formula and atom\_site data

| atom | Z*formula | cif sites | diff |
|------|-----------|-----------|------|
| C    | 70.00     | 70.00     | 0.00 |
| H    | 66.00     | 62.00     | 4.00 |
| Co   | 2.00      | 2.00      | 0.00 |
| N    | 12.00     | 12.00     | 0.00 |
| O    | 22.00     | 22.00     | 0.00 |
| S    | 2.00      | 2.00      | 0.00 |

PLAT004\_ALERT\_5\_G Polymeric Structure Found with Maximum Dimension 2 Info  
 PLAT007\_ALERT\_5\_G Number of Unrefined Donor-H Atoms ..... 5 Report  
           H2A  H3A  H6A  H10A  H10C  
 PLAT302\_ALERT\_4\_G Anion/Solvent/Minor-Residue Disorder (Resd 2) 100% Note  
 PLAT302\_ALERT\_4\_G Anion/Solvent/Minor-Residue Disorder (Resd 3) 100% Note  
 PLAT311\_ALERT\_2\_G Isolated Disordered Oxygen Atom (No H's ?) ..... 011 Check  
 PLAT311\_ALERT\_2\_G Isolated Disordered Oxygen Atom (No H's ?) ..... 011' Check  
 PLAT794\_ALERT\_5\_G Tentative Bond Valency for Co (II) . 1.91 Info  
 PLAT883\_ALERT\_1\_G No Info/Value for \_atom\_sites\_solution\_primary . Please Do !  
 PLAT899\_ALERT\_4\_G SHELXL2018 is Deprecated and Succeeded by SHELXL 2019/3 Note  
 PLAT967\_ALERT\_5\_G Note: Two-Theta Cutoff Value in Embedded .res .. 52.0 Degree  
 PLAT969\_ALERT\_5\_G The 'Henn et al.' R-Factor-gap value ..... 1.89 Note  
           Predicted wR2: Based on SigI\*\*2 5.62 or SHELX Weight 10.97  
 PLAT978\_ALERT\_2\_G Number C-C Bonds with Positive Residual Density. 0 Info

---

0 **ALERT level A** = Most likely a serious problem - resolve or explain  
 0 **ALERT level B** = A potentially serious problem, consider carefully  
 8 **ALERT level C** = Check. Ensure it is not caused by an omission or oversight  
 15 **ALERT level G** = General information/check it is not something unexpected

6 ALERT type 1 CIF construction/syntax error, inconsistent or missing data  
 8 ALERT type 2 Indicator that the structure model may be wrong or deficient  
 1 ALERT type 3 Indicator that the structure quality may be low  
 3 ALERT type 4 Improvement, methodology, query or suggestion  
 5 ALERT type 5 Informative message, check

---

## Datablock: 4

---

Bond precision: C-C = 0.0070 A

Wavelength=0.71073

Cell: a=13.9967(9) b=14.4949(8) c=14.9094(8)  
       alpha=104.0893(14) beta=93.1620(15) gamma=114.1365(14)  
 Temperature: 296 K

|                        | Calculated                        | Reported              |
|------------------------|-----------------------------------|-----------------------|
| Volume                 | 2636.1(3)                         | 2636.1(3)             |
| Space group            | P -1                              | P -1                  |
| Hall group             | -P 1                              | -P 1                  |
| Moiety formula         | C49 H40 Co2 N6 O17 S2, 3(H2 O), O | ?                     |
| Sum formula            | C49 H46 Co2 N6 O21 S2             | C49 H49 Co2 N6 O21 S2 |
| Mr                     | 1236.90                           | 1239.92               |
| Dx, g cm <sup>-3</sup> | 1.558                             | 1.562                 |
| Z                      | 2                                 | 2                     |
| Mu (mm <sup>-1</sup> ) | 0.795                             | 0.795                 |
| F000                   | 1272.0                            | 1278.0                |
| F000'                  | 1274.53                           |                       |
| h, k, lmax             | 17, 17, 18                        | 17, 17, 18            |
| Nref                   | 10361                             | 10361                 |
| Tmin, Tmax             | 0.735, 0.728                      | 0.681, 0.746          |
| Tmin'                  | 0.720                             |                       |

Correction method= # Reported T Limits: Tmin=0.681 Tmax=0.746  
AbsCorr = MULTI\_SCAN

Data completeness= 1.000                      Theta(max)= 25.999

R(reflections)= 0.0495( 7417)                      wR2(reflections)=  
S = 1.019                      Npar= 776                      0.1364( 10361)

The following ALERTS were generated. Each ALERT has the format  
**test-name\_ALERT\_alert-type\_alert-level.**  
Click on the hyperlinks for more details of the test.

### Alert level C

|                   |                                                  |                             |              |
|-------------------|--------------------------------------------------|-----------------------------|--------------|
| PLAT041_ALERT_1_C | Calc. and Reported SumFormula                    | Strings Differ              | Please Check |
|                   | Calc: C49 H46 Co2 N6 O21 S2                      |                             |              |
|                   | Rep.: C49 H49 Co2 N6 O21 S2                      |                             |              |
| PLAT042_ALERT_1_C | Calc. and Reported MoietyFormula                 | Strings Differ              | Please Check |
|                   | Calc: C49 H40 Co2 N6 O17 S2, 3(H2 O), O          |                             |              |
|                   | Rep.: ?'                                         |                             |              |
| PLAT043_ALERT_1_C | Calculated and Reported Mol. Weight              | Differ by ..                | 3.02 Check   |
| PLAT068_ALERT_1_C | Reported F000 Differs from Calcd (or Missing)... |                             | Please Check |
| PLAT202_ALERT_3_C | Isotropic non-H Atoms in Anion/Solvent .....     |                             | 1 Check      |
|                   | O21                                              |                             |              |
| PLAT213_ALERT_2_C | Atom N6                                          | has ADP max/min Ratio ..... | 3.3 prolat   |
| PLAT213_ALERT_2_C | Atom C48                                         | has ADP max/min Ratio ..... | 3.3 prolat   |
| PLAT213_ALERT_2_C | Atom C49                                         | has ADP max/min Ratio ..... | 3.4 prolat   |
| PLAT220_ALERT_2_C | NonSolvent Resd 1 C                              | Ueq(max)/Ueq(min) Range     | 4.9 Ratio    |
| PLAT220_ALERT_2_C | NonSolvent Resd 1 N                              | Ueq(max)/Ueq(min) Range     | 3.2 Ratio    |



|                   |                                       |                                     |                                 |         |            |
|-------------------|---------------------------------------|-------------------------------------|---------------------------------|---------|------------|
| PLAT241_ALERT_2_C | High                                  | 'MainMol'                           | Ueq as Compared to Neighbors of | N6      | Check      |
| PLAT241_ALERT_2_C | High                                  | 'MainMol'                           | Ueq as Compared to Neighbors of | C21     | Check      |
| PLAT241_ALERT_2_C | High                                  | 'MainMol'                           | Ueq as Compared to Neighbors of | C48     | Check      |
| PLAT241_ALERT_2_C | High                                  | 'MainMol'                           | Ueq as Compared to Neighbors of | C49     | Check      |
| PLAT242_ALERT_2_C | Low                                   | 'MainMol'                           | Ueq as Compared to Neighbors of | C44     | Check      |
| PLAT242_ALERT_2_C | Low                                   | 'MainMol'                           | Ueq as Compared to Neighbors of | C47     | Check      |
| PLAT260_ALERT_2_C | Large                                 | Average Ueq of Residue Including    | O20                             | 0.140   | Check      |
| PLAT260_ALERT_2_C | Large                                 | Average Ueq of Residue Including    | O19                             | 0.164   | Check      |
| PLAT329_ALERT_4_C | Carbon Atom Hybridisation Unclear for | .....                               | C20'                            | Check   |            |
| PLAT334_ALERT_2_C | Small                                 | <C-C> Benzene Dist.                 | C44 -C49                        | .       | 1.37 Ang.  |
| PLAT341_ALERT_3_C | Low                                   | Bond Precision on C-C Bonds         | .....                           | 0.00695 | Ang.       |
| PLAT369_ALERT_2_C | Long                                  | C(sp2)-C(sp2) Bond                  | C7 - C8                         | .       | 1.53 Ang.  |
| PLAT417_ALERT_2_C | Short                                 | Inter D-H..H-D                      | H17C ..H19C                     | .       | 2.11 Ang.  |
|                   |                                       |                                     | 1+x,y,z =                       | 1_655   | Check      |
| PLAT905_ALERT_3_C | Negative                              | K value in the Analysis of Variance | ...                             | -2.112  | Report     |
| PLAT976_ALERT_2_C | Check                                 | Calcd Resid. Dens.                  | 0.75Ang From O19                | .       | -0.59 eA-3 |
| PLAT976_ALERT_2_C | Check                                 | Calcd Resid. Dens.                  | 0.75Ang From O19                | .       | -0.42 eA-3 |
| PLAT976_ALERT_2_C | Check                                 | Calcd Resid. Dens.                  | 0.67Ang From O19                | .       | -0.42 eA-3 |
| PLAT976_ALERT_2_C | Check                                 | Calcd Resid. Dens.                  | 0.96Ang From O17                | .       | -0.41 eA-3 |

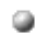

### Alert level G

FORMU01\_ALERT\_2\_G There is a discrepancy between the atom counts in the  
     \_chemical\_formula\_sum and the formula from the \_atom\_site\* data.  
     Atom count from \_chemical\_formula\_sum: C49 H49 Co2 N6 O21 S2  
     Atom count from the \_atom\_site data: C49 H46 Co2 N6 O21 S2

CELLZ01\_ALERT\_1\_G Difference between formula and atom\_site contents detected.

CELLZ01\_ALERT\_1\_G WARNING: H atoms missing from atom site list. Is this intentional?  
     From the CIF: \_cell\_formula\_units\_Z 2  
     From the CIF: \_chemical\_formula\_sum C49 H49 Co2 N6 O21 S2  
     TEST: Compare cell contents of formula and atom\_site data

| atom | Z*formula | cif sites | diff |
|------|-----------|-----------|------|
| C    | 98.00     | 98.00     | 0.00 |
| H    | 98.00     | 92.00     | 6.00 |
| Co   | 4.00      | 4.00      | 0.00 |
| N    | 12.00     | 12.00     | 0.00 |
| O    | 42.00     | 42.00     | 0.00 |
| S    | 4.00      | 4.00      | 0.00 |

PLAT002\_ALERT\_2\_G Number of Distance or Angle Restraints on AtSite 3 Note

PLAT003\_ALERT\_2\_G Number of Uiso or Uij Restrained non-H Atoms ... 1 Report

PLAT004\_ALERT\_5\_G Polymeric Structure Found with Maximum Dimension 2 Info

PLAT007\_ALERT\_5\_G Number of Unrefined Donor-H Atoms ..... 14 Report

    H2A H3A H16B H16C H17C H17D H20E H20F H18A H18B H19C  
     H19D H18D H18E

PLAT083\_ALERT\_2\_G SHELXL Second Parameter in WGHT Unusually Large 5.86 Why ?

PLAT172\_ALERT\_4\_G The CIF-Embedded .res File Contains DFIX Records 1 Report

PLAT301\_ALERT\_3\_G Main Residue Disorder .....(Resd 1) 5% Note

PLAT302\_ALERT\_4\_G Anion/Solvent/Minor-Residue Disorder (Resd 2) 100% Note

PLAT302\_ALERT\_4\_G Anion/Solvent/Minor-Residue Disorder (Resd 3) 100% Note

PLAT302\_ALERT\_4\_G Anion/Solvent/Minor-Residue Disorder (Resd 5) 100% Note

PLAT302\_ALERT\_4\_G Anion/Solvent/Minor-Residue Disorder (Resd 6) 100% Note

PLAT302\_ALERT\_4\_G Anion/Solvent/Minor-Residue Disorder (Resd 7) 100% Note

PLAT311\_ALERT\_2\_G Isolated Disordered Oxygen Atom (No H's ?) ..... 020' Check

PLAT311\_ALERT\_2\_G Isolated Disordered Oxygen Atom (No H's ?) ..... 021 Check

PLAT311\_ALERT\_2\_G Isolated Disordered Oxygen Atom (No H's ?) ..... 021' Check

PLAT410\_ALERT\_2\_G Short Intra H...H Contact H48A ..H19B . 2.01 Ang.

|                   |                                                  |                      |       |              |
|-------------------|--------------------------------------------------|----------------------|-------|--------------|
|                   |                                                  | x,y,-1+z =           | 1_554 | Check        |
| PLAT414_ALERT_2_G | Short Intra D-H..H-X                             | H17C ..H19A .        | 1.92  | Ang.         |
|                   |                                                  | x,y,z =              | 1_555 | Check        |
| PLAT417_ALERT_2_G | Short Inter D-H..H-D                             | H3A ..H18A .         | 1.53  | Ang.         |
|                   |                                                  | x,y,z =              | 1_555 | Check        |
| PLAT794_ALERT_5_G | Tentative Bond Valency for Co1                   | (II) .               | 1.98  | Info         |
| PLAT860_ALERT_3_G | Number of Least-Squares Restraints .....         |                      | 2     | Note         |
| PLAT883_ALERT_1_G | No Info/Value for _atom_sites_solution_primary . |                      |       | Please Do !  |
| PLAT941_ALERT_3_G | Average HKL Measurement Multiplicity .....       |                      | 4.5   | Low          |
| PLAT965_ALERT_2_G | The SHELXL WEIGHT Optimisation has not Converged |                      |       | Please Check |
| PLAT967_ALERT_5_G | Note: Two-Theta Cutoff Value in Embedded .res .. |                      | 52.0  | Degree       |
| PLAT969_ALERT_5_G | The 'Henn et al.' R-Factor-gap value .....       |                      | 3.40  | Note         |
|                   | Predicted wR2: Based on SigI**2                  | 4.01 or SHELX Weight | 13.91 |              |
| PLAT978_ALERT_2_G | Number C-C Bonds with Positive Residual Density. |                      | 0     | Info         |

---

0 **ALERT level A** = Most likely a serious problem - resolve or explain  
 0 **ALERT level B** = A potentially serious problem, consider carefully  
 28 **ALERT level C** = Check. Ensure it is not caused by an omission or oversight  
 29 **ALERT level G** = General information/check it is not something unexpected

7 ALERT type 1 CIF construction/syntax error, inconsistent or missing data  
 32 ALERT type 2 Indicator that the structure model may be wrong or deficient  
 6 ALERT type 3 Indicator that the structure quality may be low  
 7 ALERT type 4 Improvement, methodology, query or suggestion  
 5 ALERT type 5 Informative message, check

---

It is advisable to attempt to resolve as many as possible of the alerts in all categories. Often the minor alerts point to easily fixed oversights, errors and omissions in your CIF or refinement strategy, so attention to these fine details can be worthwhile. In order to resolve some of the more serious problems it may be necessary to carry out additional measurements or structure refinements. However, the purpose of your study may justify the reported deviations and the more serious of these should normally be commented upon in the discussion or experimental section of a paper or in the "special\_details" fields of the CIF. checkCIF was carefully designed to identify outliers and unusual parameters, but every test has its limitations and alerts that are not important in a particular case may appear. Conversely, the absence of alerts does not guarantee there are no aspects of the results needing attention. It is up to the individual to critically assess their own results and, if necessary, seek expert advice.

### **Publication of your CIF in IUCr journals**

A basic structural check has been run on your CIF. These basic checks will be run on all CIFs submitted for publication in IUCr journals (*Acta Crystallographica*, *Journal of Applied Crystallography*, *Journal of Synchrotron Radiation*); however, if you intend to submit to *Acta Crystallographica Section C* or *E* or *IUCrData*, you should make sure that full publication checks are run on the final version of your CIF prior to submission.

### **Publication of your CIF in other journals**

Please refer to the *Notes for Authors* of the relevant journal for any special instructions relating to CIF submission.

---

**PLATON version of 06/01/2024; check.def file version of 05/01/2024**

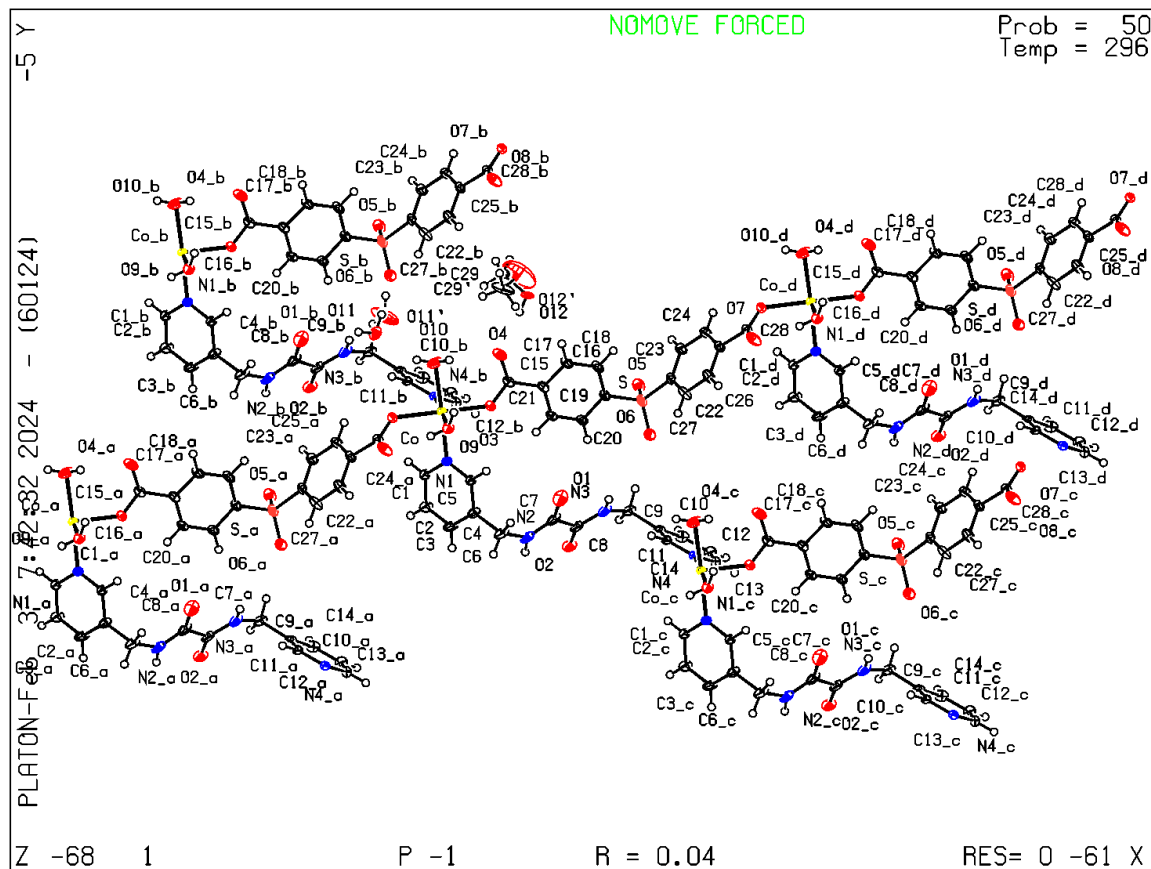

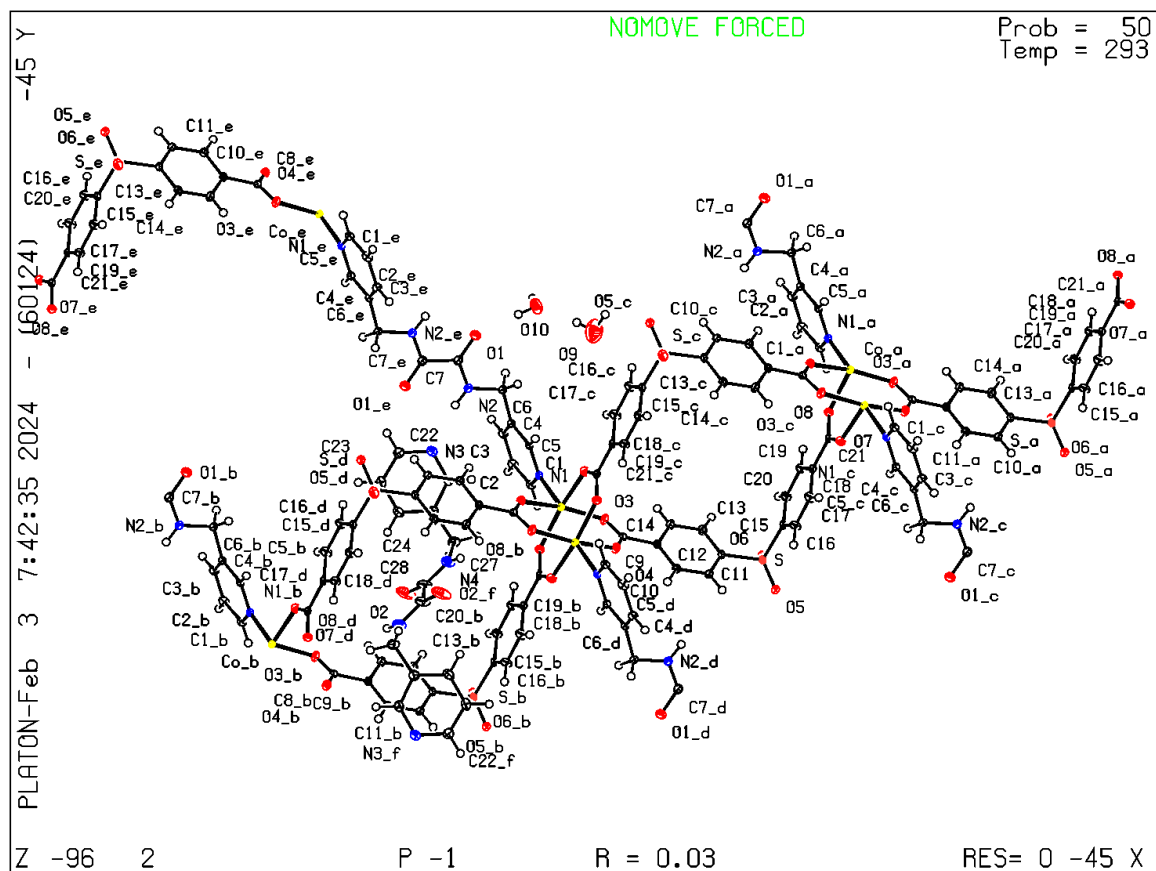

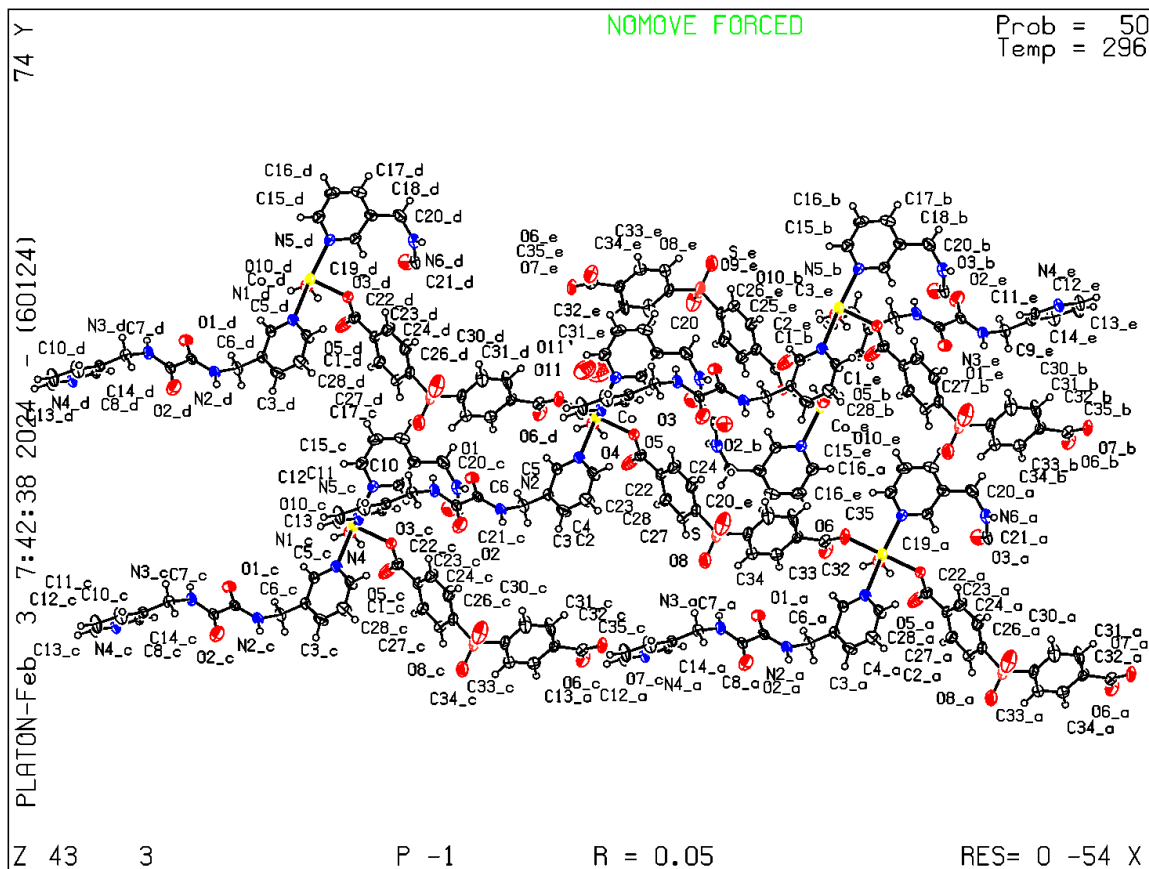

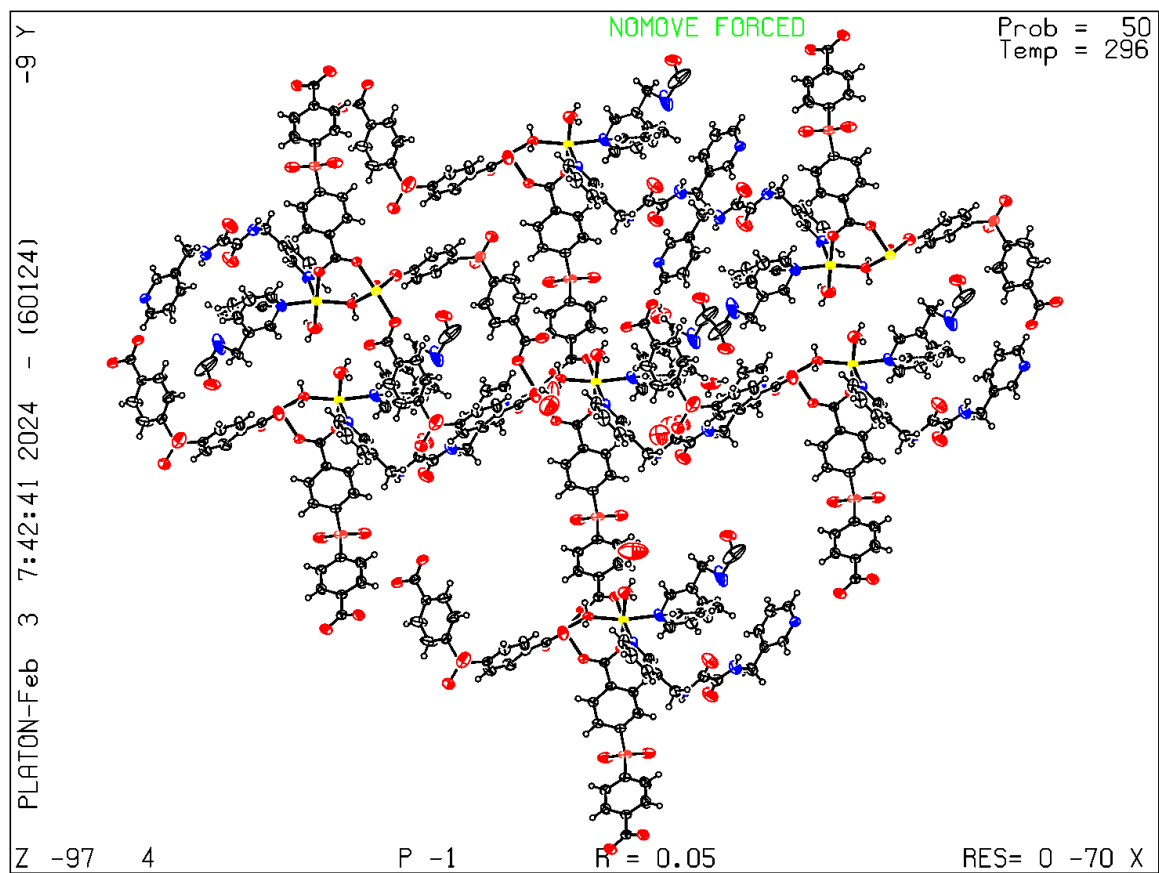

Supplement: Supplementary file 1 [file supplementary:checkcif.pdf]
